# Supplementary material
Source: Springer Nature journal article supplement (https://www.springermedizin.de/resource/supplementary/12939_2014_470_MOESM1_ESM.pdf/9551230)

# Working around the systems

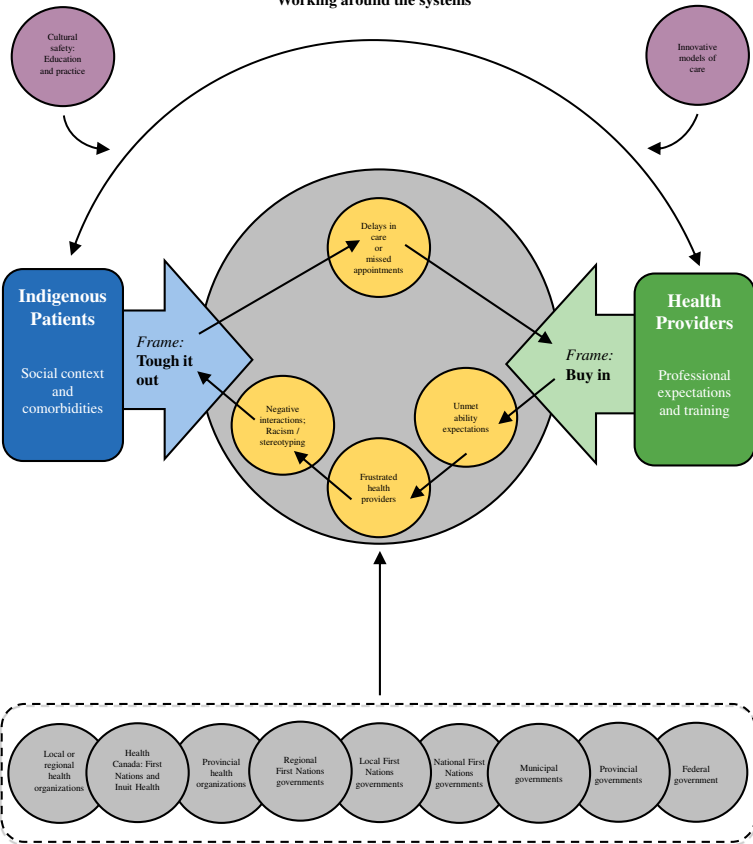

**Influences on health systems for Indigenous Peoples in Canada**

Supplement: MOESM1 [file 9551230]
